# Supplementary material
Source: HighWire-hosted journal article supplement (https://mct.aacrjournals.org/content/suppl/2012/11/09/1535-7163.MCT-12-0644-T)

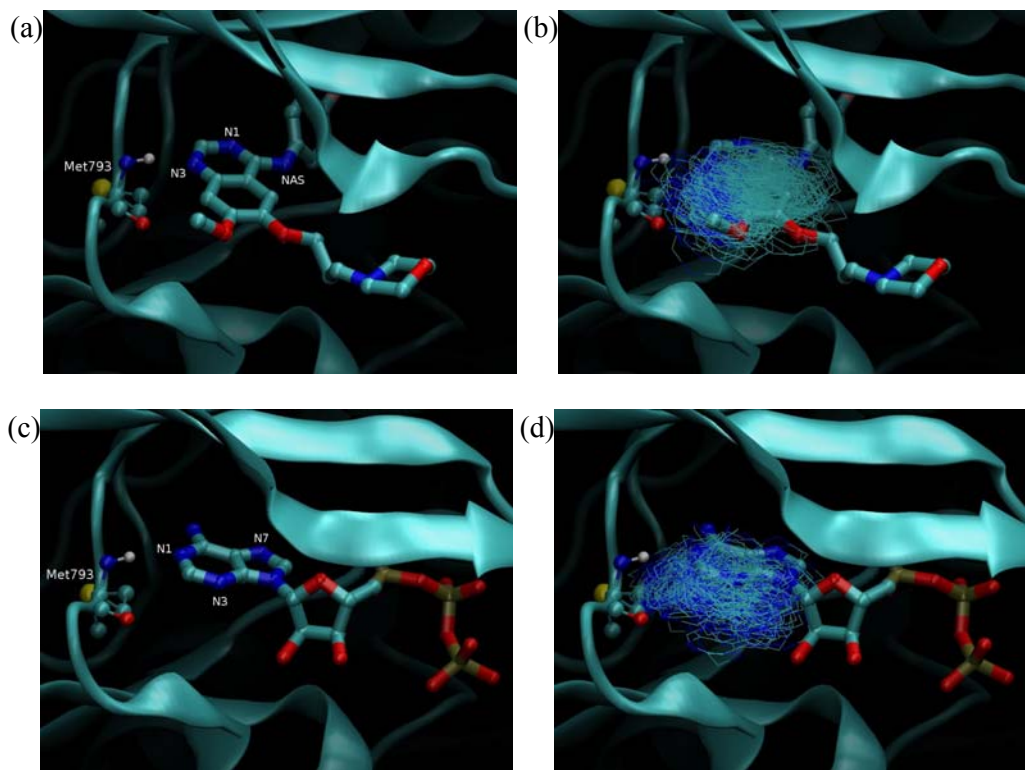

**Figure S2.** The binding positions of gefitinib ((a) and (b)) and ATP ((c) and (d)) in the binding site of EGFR.

Supplement: fig_2_98K.pdf [file fig_2_98K.pdf]
